# Supplementary material
Source: PubMed Central journal article supplement (PMC6430556)
Supplement: JVI.02168-18-s0002.pdf [file JVI.02168-18-s0002.pdf]

## Supplementary table 1

### list of qPCR primers used in this study

| <i>Designation</i>       | <i>5' – 3' Forward</i>                      | <i>5' – 3' Reverse</i>         | <i>Manufacturer</i> |
|--------------------------|---------------------------------------------|--------------------------------|---------------------|
| <b>SyBR Green</b>        |                                             |                                |                     |
| TP53i9 minigene $\alpha$ | CTTCAGATCCGTGGGCGTGA                        | CTGCAGAATTCGCCCTTC<br>TG       | Eurogentec          |
| TP53i9 minigene $\beta$  | AAGAGAGCATGAAAATGGT<br>TCTATGA              |                                | Eurogentec          |
| TP53i9 minigene $\gamma$ | CACCCTTCAGATGCTACTTG                        |                                | Eurogentec          |
| Neomycin                 | AGACAATCGGCTGCTCTGAT                        | CAATAGCAGCCAGTCCCT<br>TC       | Eurogentec          |
| CPSF4                    | QuantiTect Primer Assay (product no 249900) |                                | Qiagen              |
| GAPDH                    | TGCACCACCAACTGCTTAG                         | G TTCAGCTCAGGGATGAC<br>C       | Eurogentec          |
| <b>TaqMan assays</b>     |                                             |                                |                     |
| P53 (Exon8/9)            | GAAGAGAATCTCCGCAAGA<br>AAGG                 | TCCATCCAGTGGTTTCTT<br>CTTG     | Eurogentec          |
| Probe P53 (Exon8/9)      | AGCACTAAGCGAGCACTGCCCAACA                   |                                | Eurogentec          |
| p53 $\beta$              | AACCACTGGATGGAGAATA<br>TTTCAC               | AAGAGAGCATGAAAATG<br>GTTCTATGA | Eurogentec          |
| Probe p53 $\beta$        | CAGGACCAGACCAGCTTTCAA AAAAGAAAATTGTT        |                                | Eurogentec          |
| Actin                    | GGCACCCAGCACAATGAAG                         | GCCGATCCACACGGAGT<br>ACT       | Eurogentec          |
| Probe Actin              | TCAAGATCATTGCTCCTCCTGAGCGC                  |                                | Eurogentec          |
